# Supplementary material for: Socially Driven Consistent Behavioural Differences during Development in Common Ravens and Carrion Crows
Source: PLOS journal article supplement (doi:10.1371/journal.pone.0148822), 2016-02-05
Supplement: S5 (10.1371/journal.pone.0148822.s005) [file journal.pone.0148822.s005]

S5 Table. Constant homophily models testing for in-group preferences of affiliative, i.e. contact sit interactions in a) sibling groups and b) tested subgroups in ravens and crows. Significant preferences for siblings in both species, though significant preferences for tested subgroup in ravens only. Significant results given in bold.

| a) Sibling groups   | R-square | <i>p</i>      | Regression coefficients |                            |                          |               |
|---------------------|----------|---------------|-------------------------|----------------------------|--------------------------|---------------|
|                     |          |               | Independent             | Unstandardized coefficient | Standardized coefficient | <i>p</i>      |
| Ravens              | 0.335    | <b>0.0041</b> | Intercept               | 9.27                       | 0.0                      | 0.996         |
|                     |          |               | In-group                | 27.93                      | 0.58                     | <b>0.0041</b> |
| Crows               | 0.191    | <b>0.0087</b> | Intercept               | 7.35                       | 0.0                      | 0.9915        |
|                     |          |               | In-group                | 13.26                      | 0.44                     | <b>0.0087</b> |
| b) Tested subgroups |          |               | Regression coefficients |                            |                          |               |
|                     |          |               | Independent             | Unstandardized coefficient | Standardized coefficient | <i>p</i>      |
| Ravens              | 0.299    | <b>0.0027</b> | Intercept               | 12.03                      | 0.0                      | 0.998         |
|                     |          |               | In-group                | 31.47                      | 0.55                     | <b>0.0027</b> |
| Crows               | 0.023    | 0.281         | Intercept               | 11.46                      | 0.0                      | 0.86          |
|                     |          |               | In-group                | 5.54                       | 0.15                     | 0.145         |
